# Supplementary material for: Towards artificial general intelligence via a multimodal foundation model
Source: PubMed Central journal article supplement (PMC9163040; doi:10.1038/s41467-022-30761-2), 2022-06-02
Supplement: 41467_2022_30761_MOESM1_ESM.pdf [file 41467_2022_30761_MOESM1_ESM.pdf]

# Towards artificial general intelligence via a multimodal foundation model – supplementary note

Nanyi Fei<sup>1,2,3</sup>, Zhiwu Lu<sup>1,2</sup>, Yizhao Gao<sup>1,2</sup>, Guoxing Yang<sup>1,2</sup>, Yuqi Huo<sup>2,3</sup>, Jingyuan Wen<sup>1,2</sup>,  
Haoyu Lu<sup>1,2</sup>, Ruihua Song<sup>1,2</sup>, Xin Gao<sup>4</sup>, Tao Xiang<sup>5</sup>, Hao Sun<sup>1,2</sup> and Ji-Rong Wen<sup>1,2,3</sup>

<sup>1</sup>Gaoling School of Artificial Intelligence, Renmin University of China, Beijing, China

<sup>2</sup>Beijing Key Laboratory of Big Data Management and Analysis Methods, Beijing, China

<sup>3</sup>School of Information, Renmin University of China, Beijing, China

<sup>4</sup>Computer, Electrical and Mathematical Sciences and Engineering Division, King Abdullah University of Science and Technology, Thuwal, Saudi Arabia

<sup>5</sup>Department of Electrical and Electronic Engineering, University of Surrey, Guildford, United Kingdom

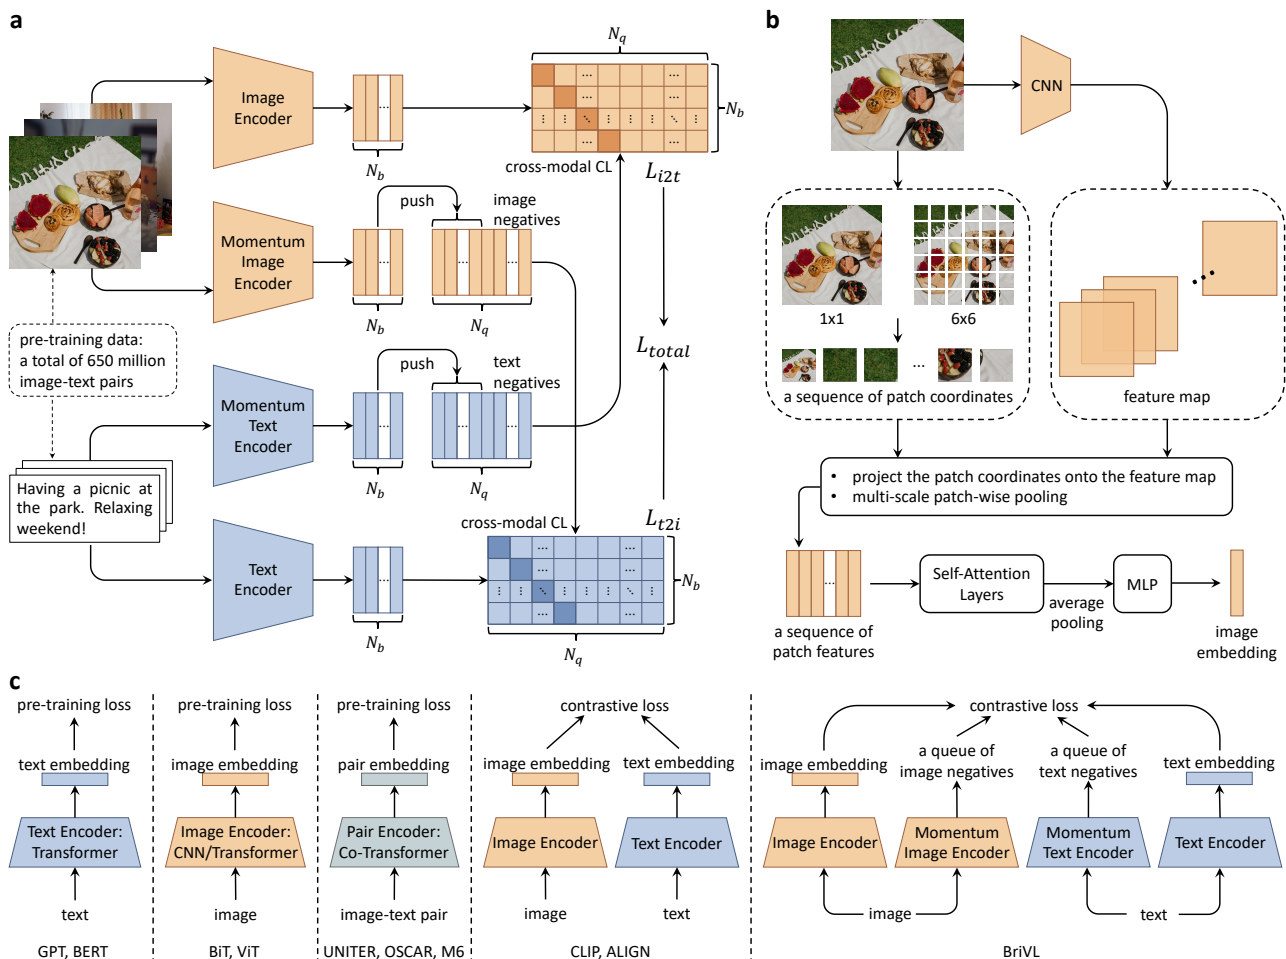

Fig. S1: Illustrations of our algorithm design, our network design, and existing pre-training architectures. **a**. The schematic illustration of the proposed BriVL model for large-scale multimodal pre-training. **b**. The detailed network architecture of our image encoder in BriVL. **c**. Illustration of existing pre-training architectures. From left to right: single-modal textual pre-training (e.g., GPT [1] and BERT [2]); single-modal visual pre-training (e.g., BiT [3] and ViT [4]); single-tower multimodal pre-training (e.g., UNITER [5], OSCAR [6], and M6 [7]); two-tower multimodal pre-training (e.g., CLIP [8] and ALIGN [9]); our BriVL.

**a**

| Method          | w/ SA Layers? | Contrastive Algorithm | Image-to-Text Retrieval |              |              | Text-to-Image Retrieval |              |              |               |
|-----------------|---------------|-----------------------|-------------------------|--------------|--------------|-------------------------|--------------|--------------|---------------|
|                 |               |                       | Recall@1                | Recall@5     | Recall@10    | Recall@1                | Recall@5     | Recall@10    | Recall@SUM    |
| BriVL w/ SimCLR | yes           | SimCLR-based          | 27.50                   | 47.32        | 55.50        | 27.10                   | 46.84        | 55.19        | 259.45        |
| BriVL w/o SA    | no            | MoCo-based            | 28.56                   | 47.98        | 55.83        | 28.02                   | 46.86        | 54.58        | 261.83        |
| BriVL           | yes           | MoCo-based            | <b>29.82</b>            | <b>49.13</b> | <b>56.47</b> | <b>29.28</b>            | <b>48.12</b> | <b>55.84</b> | <b>268.66</b> |

**b**

Query



On October 30, in Fullerton, California, USA, firefighters work on the fire scene. In recent days, wildfires in California, the United States, have continued to rage, and a large number of residents have been forced to evacuate.

Retrieval Results

| Top1                                                                                                                                                                                     | Top2                                                                                                                                                                                                             | Top3                                                                                                                                                      | Top4                                                                                                   | Top5                                                                                                                                                                                                                  |
|------------------------------------------------------------------------------------------------------------------------------------------------------------------------------------------|------------------------------------------------------------------------------------------------------------------------------------------------------------------------------------------------------------------|-----------------------------------------------------------------------------------------------------------------------------------------------------------|--------------------------------------------------------------------------------------------------------|-----------------------------------------------------------------------------------------------------------------------------------------------------------------------------------------------------------------------|
| Drinking tea often when there is nothing wrong with it can help you to cultivate your body and improve your sex, and it can also reduce the body's cholesterol and triglyceride content. | Keeping an optimistic life is the mood, and people live the mentality. Life is precious. Instead of worrying too much about complicated and trivial matters, it is better to treat yourself and relax your life. | Cherish your busy time, being busy is the most precious medicine in the world. Busy people are happy, because there is something to do, life is valuable. | People are like grass and mustards, life is easy to break, and cherish life is precious, not wasteful. | "Know yourself and the enemy, a hundred battles will never be lost." This is the truth drawn from practice. No matter what kind of industry you are in, the important prerequisite for success is to "know yourself". |
|                                                                                                         |                                                                                                                                 |                                                                         |                     |                                                                                                                                    |

Fig. S2: **Quantitative and qualitative results with 22M training data.** **a.** Ablative results (%) of BriVL on the 11K test set. **b.** Cross-modal retrieval examples of our standard BriVL model (note that images were taken from the Pexels website for illustration). Texts are translated into English for representation clarity. Highest results are highlighted in bold.

## 11 Architecture Overview

12 In Fig. S1a, we present the schematic illustration of our proposed BriVL model for large-scale multimodal pre-training.  
 13 In Fig. S1b, we show the network details of our image encoder in BriVL. In Fig. S1c, existing architectures for pre-  
 14 training are illustrated. Please see Methods of the main manuscript for more information.

## 15 Ablation Study

16 To show the contributions of the self-attention (SA) layers used in both encoders and the cross-modal contrastive  
 17 loss based on MoCo [10], we conduct experiments by whether using SA layers and adopting alternative contrastive  
 18 losses. Since it is too costly to conduct the ablation study on our full WSCD dataset (of 650M image-text pairs),  
 19 we only use 22M image-text pairs for training and another 11K for evaluation. We provide the same 9 machines  
 20 (each has 8 NVIDIA A100 GPUs) for all ablation experiments. The compared methods are as follows: (1) BriVL w/  
 21 BYOL: We replace the MoCo-based cross-modal contrastive algorithm in our standard BriVL model with BYOL [11],  
 22 which does not need any negative samples and only focuses on matching the positive ones. (2) BriVL w/ SimCLR:  
 23 We replace the MoCo-based cross-modal contrastive algorithm with SimCLR [12], which does not have momentum  
 24 encoders or negative sample queues, and computes the InfoNCE loss [13] within each batch. In other words, the  
 25 mini-batch size decides the number of negative samples for each positive image-text pair. Note that CLIP [8] and  
 26 ALIGN [9] both adopt SimCLR-based contrastive loss. (3) BriVL w/o SA: We discard the SA layers from both image  
 27 and text encoders comparing to our standard BriVL. (4) BriVL: Our standard model with SA layers and MoCo-based  
 28 cross-modal contrastive algorithm. All methods are trained for 6 epochs.

29 The ablative results are shown in the table of Fig. S2a. Note that we do not report the results of BriVL w/ BYOL  
 30 because no matter how we try (e.g., tuning the hyper-parameters and implementing in different ways), the model  
 31 always collapses. One possible reason is that BYOL only works under single-modal scenarios and it is essential to  
 32 include negative samples under multimodal scenarios. Moreover, since SimCLR has neither momentum encoders nor  
 33 negative sample queues, its mini-batch size  $N_b$  can be larger than that of standard BriVL with the same computational  
 34 resources. Concretely, the total batch size is 2,160 for SimCLR and 1,728 for standard BriVL which additionally  
 35 maintains two negative sample queues with the size of 10,368 (since momentum encoders and negative sample queues  
 36 do not produce gradients, they take up little GPU memory). However, we can then see from the table that BriVL  
 37 w/ SimCLR performs worse than our standard BriVL (based on MoCo) for all 7 evaluation metrics. This indicates

| Method                           | Question Type |              |              |              |              |              | Overall      |
|----------------------------------|---------------|--------------|--------------|--------------|--------------|--------------|--------------|
|                                  | What          | Where        | When         | Who          | Why          | How          |              |
| BriVL-en (direct training)       | 76.74         | 77.13        | 78.12        | 76.21        | 76.45        | 77.55        | 76.91        |
| BriVL-en (pre-train & zero-shot) | 52.40         | 53.24        | 53.11        | 53.29        | 52.34        | 52.98        | 52.75        |
| BriVL-en (pre-train & finetune)  | <b>81.20</b>  | <b>81.69</b> | <b>81.36</b> | <b>80.45</b> | <b>80.64</b> | <b>81.75</b> | <b>81.26</b> |

  

| Method                          | BLEU @4      | METEOR       | CIDEr        | SPICE        | ROUGE-L      |
|---------------------------------|--------------|--------------|--------------|--------------|--------------|
| BriVL-en (direct training)      | 18.87        | 14.44        | 37.06        | 12.71        | 44.01        |
| BriVL-en (pre-train & finetune) | <b>20.18</b> | <b>21.90</b> | <b>44.47</b> | <b>15.54</b> | <b>45.85</b> |

  

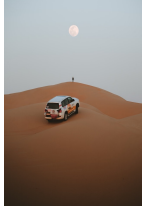

**BriVL-en (direct training):**

- A red vehicle is driving down a dirt road.

**BriVL-en (pre-train & finetune):**

- A white car is parked in the desert with a lot of sand.



**BriVL-en (direct training):**

- A dog is running on the grass with a ball in its mouth.

**BriVL-en (pre-train & finetune):**

- A dog is catching a ball.



**BriVL-en (direct training):**

- A dog is running across the water.

**BriVL-en (pre-train & finetune):**

- A dog running on a beach.

Fig. S3: **Results on two English downstream tasks.** **a.** Visual question answering results on Visual7W. Overall accuracies (%) along with results on each question type are reported. **b.** Image captioning results (%) on the test split of Flickr30K. **c.** Image captioning examples of our BriVL-en model regarding whether it is pre-trained. Highest results are highlighted in bold.

the importance of large number of negative samples in multimodal pre-training and the advantage of our standard BriVL when large batch size is not feasible. Our model design thus hopefully helps those researchers with limited GPU resources for multimodal pre-training. Besides, comparing to our standard BriVL, discarding the SA layers (i.e., BriVL w/o SA) also leads to performance drop, which validates the effectiveness of this module.

Furthermore, in Fig. S2b, we present two cross-modal retrieval examples with our standard BriVL model trained on the 22M data. The query image for text retrieval and the candidate images for image retrieval are all taken from the Pexels website (<https://www.pexels.com/>), while the texts are picked from the 11K test set. We can observe that the returned top-5 texts for the query image containing a cup of tea are all philosophical sentences, validating the effectiveness of training BriVL over weak semantic correlation data. Further, for the text query in the second row, our BriVL also does a great job in finding the matched images.

## Results on English Tasks

In this section, we pre-train our proposed model on a well-known English dataset and name it as BriVL-en. Concretely, the pre-training English dataset consists of 4 publicly-available image captioning datasets. (1) **MSCOCO** [14]: We only use the training split of MSCOCO, which contains 113,287 images (each image has 5 text captions). (2) **Flickr30K** [15]: We use the training set of Flickr30K, which contains 29,783 images (each image also has 5 text captions). (3) **SBU Captioned Photo Dataset (SBU)** [16]: We collect SBU by the provided urls and obtain around 867K image-text pairs. We use the whole SBU dataset. (4) **Conceptual Captions (CC)** [17]: We also collect and use the whole CC dataset, which contains around 3M image-text pairs. As a result, the total size of the pre-training English dataset is around 4M.

In the next two subsections, we conduct experiments on two downstream tasks (i.e., visual question answering and image captioning) to show the potential use of our English model BriVL-en. Importantly, the obtained similar results indicate that our model indeed provides a feasible solution closer to AGI beyond specific languages.

**Visual Question Answering.** We first conduct visual question answering (VQA) experiments on the Visual7W dataset [18] with three BriVL-en variations. The dataset split is the same as that for Chinese VQA experiments in the main paper, but this time we do not need to translate the texts. In the table of Fig. S3a, we report the overall accuracies on the test set of Visual7W, as well as the results on each question type. We can make the following observations: (1) “BriVL-en (pre-train & zero-shot)” performs much worse than “BriVL-en (direct training)”. This is mainly because the VQA task has a large domain gap to our pre-training task and the data distributions are also totally different. (2) “BriVL-en (pre-train & finetune)” outperforms “BriVL-en (direct training)” by large margins for all evaluation metrics, indicating the effectiveness of the pre-trained model and also the importance of finetuning when the data distribution of the downstream task is different with that of the pre-training data.

**Image Captioning.** Image captioning aims to generate descriptions for given images. In the table of Fig. S3b, we report the results on the test split of Flickr30K [15] (1K images) w.r.t. five commonly-used evaluation metrics in the field of image captioning. Since an additional Transformer [19] decoder is needed to generate texts, we cannot conduct

72 zero-shot experiments. We can see that “BriVL-en (pre-train & finetune)” outperforms “BriVL-en (direct training)”  
 73 for all metrics, again validating the effectiveness of pre-training.

74 Furthermore, we present three image captioning examples in Fig. S3c. For the first image, “BriVL-en (pre-train  
 75 & finetune)” points out that the car is white instead of red, and is parked in the desert rather than driving down a  
 76 dirt road. Actually it is hard to tell whether the car is driving or parked. But as we see a man standing out there,  
 77 it is highly possible that the car is parked (which is commonsensical). For the second image, “BriVL-en (pre-train  
 78 & finetune)” knows that the dog is catching the ball rather than “running on the grass with a ball in its mouth”.  
 79 Here, our pre-trained BriVL-en describes the action of the dog running towards the ball as “catching a ball”, which is  
 80 impressive. For the third image, despite the reflection under the dog, “BriVL-en (pre-train & finetune)” sees that the  
 81 dog is running on a beach rather than across the water. This also shows the hint of common sense because running  
 82 across the water is illogical and the dog is most likely to be on a beach considering the distant waves.

## 83 Image Sources

84 Except the images that are owned by us, all others used in both the main manuscript and the supplementary note  
 85 are taken from the Pexels website (<https://www.pexels.com>), which provides free stock photos and allows users to  
 86 download for free use (see its license page “<https://www.pexels.com/license/>” for more information). We list all  
 87 images that are taken from the public (i.e., the Pexels website) in Table S1.

Table S1: The sources of images used in this work.

|    | <b>Image</b>                                                | <b>Source (URL)</b>                                                                                                                                                                     |
|----|-------------------------------------------------------------|-----------------------------------------------------------------------------------------------------------------------------------------------------------------------------------------|
| 1  | The cake image in Fig. 1b.                                  | <a href="https://www.pexels.com/photo/a-close-up-shot-of-a-cake-with-a-candle-on-top-8015277/">https://www.pexels.com/photo/a-close-up-shot-of-a-cake-with-a-candle-on-top-8015277/</a> |
| 2  | The “baseball field” image at the top of Fig. 4c.           | <a href="https://www.pexels.com/photo/city-road-landscape-flying-9739479/">https://www.pexels.com/photo/city-road-landscape-flying-9739479/</a>                                         |
| 3  | The first image (from left) in Fig. 6c.                     | <a href="https://www.pexels.com/photo/selective-focus-photography-of-train-610683/">https://www.pexels.com/photo/selective-focus-photography-of-train-610683/</a>                       |
| 4  | The second image (from left) in Fig. 6c.                    | <a href="https://www.pexels.com/photo/photo-of-horses-grazing-in-grass-field-2050425/">https://www.pexels.com/photo/photo-of-horses-grazing-in-grass-field-2050425/</a>                 |
| 5  | The third image (from left) in Fig. 6c.                     | <a href="https://images.pexels.com/photos/752882/pexels-photo-752882.jpeg">https://images.pexels.com/photos/752882/pexels-photo-752882.jpeg</a>                                         |
| 6  | The fourth image (from left) in Fig. 6c.                    | <a href="https://www.pexels.com/photo/vehicles-stop-on-red-light-771184/">https://www.pexels.com/photo/vehicles-stop-on-red-light-771184/</a>                                           |
| 7  | The picnic image in Fig. S1a and Fig. S1b.                  | <a href="https://www.pexels.com/photo/food-platters-on-picnic-blanket-5076436/">https://www.pexels.com/photo/food-platters-on-picnic-blanket-5076436/</a>                               |
| 8  | The upper-left middle image in Fig. S1a.                    | <a href="https://www.pexels.com/photo/white-and-blue-floral-table-lamp-1793037/">https://www.pexels.com/photo/white-and-blue-floral-table-lamp-1793037/</a>                             |
| 9  | The upper-left back image in Fig. S1a.                      | <a href="https://www.pexels.com/photo/green-christmas-tree-with-baubles-6139342/">https://www.pexels.com/photo/green-christmas-tree-with-baubles-6139342/</a>                           |
| 10 | The tea cup image in Fig. S2b.                              | <a href="https://www.pexels.com/photo/teacup-with-tea-905485/">https://www.pexels.com/photo/teacup-with-tea-905485/</a>                                                                 |
| 11 | The first image (from left) in the second row of Fig. S2b.  | <a href="https://www.pexels.com/photo/bushfire-4070651/">https://www.pexels.com/photo/bushfire-4070651/</a>                                                                             |
| 12 | The second image (from left) in the second row of Fig. S2b. | <a href="https://www.pexels.com/photo/yellow-plane-flying-over-a-forest-fire-4902033/">https://www.pexels.com/photo/yellow-plane-flying-over-a-forest-fire-4902033/</a>                 |
| 13 | The third image (from left) in the second row of Fig. S2b.  | <a href="https://www.pexels.com/photo/photo-of-burning-forest-4621457/">https://www.pexels.com/photo/photo-of-burning-forest-4621457/</a>                                               |
| 14 | The fourth image (from left) in the second row of Fig. S2b. | <a href="https://www.pexels.com/photo/forest-fire-4070727/">https://www.pexels.com/photo/forest-fire-4070727/</a>                                                                       |
| 15 | The fifth image (from left) in the second row of Fig. S2b.  | <a href="https://www.pexels.com/photo/blazing-fire-in-the-forest-4636324/">https://www.pexels.com/photo/blazing-fire-in-the-forest-4636324/</a>                                         |
| 16 | The left image in Fig. S3c.                                 | <a href="https://www.pexels.com/photo/car-on-a-dessert-4318822/">https://www.pexels.com/photo/car-on-a-dessert-4318822/</a>                                                             |
| 17 | The middle image in Fig. S3c.                               | <a href="https://www.pexels.com/photo/tilt-shot-photo-of-dog-chasing-the-ball-1562983/">https://www.pexels.com/photo/tilt-shot-photo-of-dog-chasing-the-ball-1562983/</a>               |
| 18 | The right image in Fig. S3c.                                | <a href="https://www.pexels.com/photo/dog-running-at-the-beach-2906033/">https://www.pexels.com/photo/dog-running-at-the-beach-2906033/</a>                                             |

## 88 Supplementary References

- 89 [1] Radford, A., Narasimhan, K., Salimans, T. & Sutskever, I. Improving language understanding by generative  
90 pre-training. *OpenAI Blog* (2018).
- 91 [2] Devlin, J., Chang, M.-W., Lee, K. & Toutanova, K. Bert: Pre-training of deep bidirectional transformers for  
92 language understanding. *arXiv preprint arXiv:1810.04805* (2018).
- 93 [3] Kolesnikov, A. *et al.* Big transfer (bit): General visual representation learning. In *European Conference on*  
94 *Computer Vision*, 491–507 (2020).
- 95 [4] Dosovitskiy, A. *et al.* An image is worth 16x16 words: Transformers for image recognition at scale. In *International*  
96 *Conference on Learning Representations* (2021).
- 97 [5] Chen, Y.-C. *et al.* Uniter: Universal image-text representation learning. In *European Conference on Computer*  
98 *Vision*, 104–120 (2020).
- 99 [6] Li, X. *et al.* Oscar: Object-semantics aligned pre-training for vision-language tasks. In *European Conference on*  
100 *Computer Vision*, 121–137 (2020).
- 101 [7] Lin, J. *et al.* M6: A chinese multimodal pretrainer. *arXiv preprint arXiv:2103.00823* (2021).
- 102 [8] Radford, A. *et al.* Learning transferable visual models from natural language supervision. In *International*  
103 *Conference on Machine Learning*, 8748–8763 (2021).
- 104 [9] Jia, C. *et al.* Scaling up visual and vision-language representation learning with noisy text supervision. In  
105 *International Conference on Machine Learning*, 4904–4916 (2021).
- 106 [10] He, K., Fan, H., Wu, Y., Xie, S. & Girshick, R. Momentum contrast for unsupervised visual representation  
107 learning. In *IEEE Conference on Computer Vision and Pattern Recognition*, 9729–9738 (2020).
- 108 [11] Grill, J.-B. *et al.* Bootstrap your own latent - a new approach to self-supervised learning. In *Advances in Neural*  
109 *Information Processing Systems*, 21271–21284 (2020).
- 110 [12] Chen, T., Kornblith, S., Norouzi, M. & Hinton, G. A simple framework for contrastive learning of visual repre-  
111 sentations. In *International Conference on Machine Learning*, 1597–1607 (2020).
- 112 [13] Oord, A. v. d., Li, Y. & Vinyals, O. Representation learning with contrastive predictive coding. *arXiv preprint*  
113 *arXiv:1807.03748* (2018).
- 114 [14] Lin, T.-Y. *et al.* Microsoft coco: Common objects in context. In *European Conference on Computer Vision*,  
115 740–755 (2014).
- 116 [15] Young, P., Lai, A., Hodosh, M. & Hockenmaier, J. From image descriptions to visual denotations: New simi-  
117 larity metrics for semantic inference over event descriptions. *Transactions of the Association for Computational*  
118 *Linguistics* **2**, 67–78 (2014).
- 119 [16] Ordonez, V., Kulkarni, G. & Berg, T. L. Im2text: Describing images using 1 million captioned photographs. In  
120 *Advances in Neural Information Processing Systems*, 1143–1151 (2011).
- 121 [17] Sharma, P., Ding, N., Goodman, S. & Soricut, R. Conceptual captions: A cleaned, hypernymed, image alt-  
122 text dataset for automatic image captioning. In *Proceedings of the 56th Annual Meeting of the Association for*  
123 *Computational Linguistics*, 2556–2565 (2018).
- 124 [18] Zhu, Y., Groth, O., Bernstein, M. S. & Fei-Fei, L. Visual7w: Grounded question answering in images. In *IEEE*  
125 *Conference on Computer Vision and Pattern Recognition*, 4995–5004 (2016).
- 126 [19] Vaswani, A. *et al.* Attention is all you need. In *Advances in Neural Information Processing Systems*, 5998–6008  
127 (2017).
